## Incidence and type of arrhythmias recorded by one-month continuous ECG monitoring in stroke patients

Castrejon Castrejon S.<sup>1</sup>; Ruiz-Ares G.<sup>2</sup>; Martinez Cossiani M.<sup>1</sup>; Rigual R.<sup>2</sup>; Gutierrez Zuniga R.<sup>2</sup>; Alonso De Lecinana M.<sup>2</sup>; Tebar D.<sup>1</sup>; Fernandez Gasso L.<sup>3</sup>; Fuentes B.<sup>2</sup>; Merino JL.<sup>1</sup>

<sup>1</sup>Robotic Cardiac Electrophysiology Unit, University Hospital La Paz, Madrid, Spain

<sup>2</sup>University Hospital La Paz, Department of Neurology, Stroke Center, Madrid, Spain

<sup>3</sup>University Hospital La Paz, Cardiac Image Unit, Department of Cardiology, Madrid, Spain

**Funding Acknowledgements:** Type of funding sources: None.

### BACKGROUND

The incidence of atrial fibrillation (AF) following stroke has been studied with implantable loop recorders. However, these devices do not record short lasting AF episodes (<30-120 seconds [s]). In addition, the incidence and type of other clinically relevant arrhythmias is poorly understood in this clinical setting.

### PURPOSE

To evaluate the incidence, type and clinical relevance of arrhythmias detected by one-month continuous ECG monitoring in patients after cryptogenic stroke.

### MATERIAL AND METHODS

Consecutive patients (p) with stroke and no previous AF or other cardioembolic or atheroembolic causes were prospectively enrolled in the study. An external wearable 2-lead ECG monitoring system (NUUBO) was used for 30 days (d) in all of them after the acute phase of the stroke. In the absence of documented AF, a parafibrillatory status was defined as >3000 atrial ectopic beats/d or >2 "micro AF" episodes (fibrillatory burst <30 s)/d or ≥1 episode of "micro AF" >14 s.

### RESULTS

130 p. were included in the study (age 73 ± 12, 57% males, 19% previous stroke, 7% ischemic cardiopathy, CHA2DSVA2Sc pre-stroke 3.1 ± 1.7). 3 were withdrawn from the study due to inadequate use (recording time <14 d) and 1 due to stroke during SARS-CoV2 infection. Total recording time was 28 ± 3 d, total analyzable ECG time was 23 ± 5 d. ECG monitoring was repeated in 12 (9.5%) p due to poor ECG quality in 6 p or high suspicion of AF despite an initial negative result in 6 p. AF >30 s was detected in a total of 27 (21.4%) p, average AF duration was 52 hours (range 30 s-22 d). AF >30s was detected in 2 (17%) p with repeated monitoring. All these patients were placed on anticoagulation. Sustained paroxysmal supraventricular tachycardia (SVT) was documented in 4 (4.4%) p without AF. All episodes of AF and SVT were asymptomatic. Mobitz I second degree AV block in 4 (3.2%) p. 3 (2.4%) p had a pacemaker implanted: 2 for severe sinus dysfunction and 1 for AV block. High-density ventricular ectopy (>3000/d) was present in 7 (6%) p and ≥1 episode of non-sustained ventricular tachycardia was detected in 26 (21%) p. A parafibrillatory status was identified in 27 (21%) p with no AF >30 s. At 1-year follow up 4/22 (18%) of patients with parafibrillatory status and 3/59 (5%) without parafibrillatory status suffered a new stroke (p = 0.08).

**CONCLUSIONS:** AF and other potentially relevant arrhythmias are frequent after stroke and easily detectable with one-month non-invasive continuous ECG monitoring. Patients with a parafibrillatory status could benefit from longer monitoring time to detect AF.
